# Supplementary material for: Association of Lifestyle and Body Composition on Risk Factors of Cardiometabolic Diseases and Biomarkers in Female Adolescents
Source: Hindawi journal article supplement (doi:10.1155/2020/9170640), 2020-07-09
Supplement: f1 [file 9170640.f1.pdf]

**Supplementary material 1** - Quantitative values of cardiometabolic disease risk factors and inflammatory markers according to the latent classes.

| Quantitative values<br>CD factors & Inflammatory<br>Markers | Class 1 ( $\gamma = 6.19\%$ ) | Class 2 ( $\gamma = 16.31\%$ ) | Class 3 ( $\gamma = 77.5\%$ ) | <i>p-values</i> |
|-------------------------------------------------------------|-------------------------------|--------------------------------|-------------------------------|-----------------|
|                                                             | Active & Sedentary LS         | Inactive & Non-Sedentary LS    | Inactive & Sedentary LS       |                 |
|                                                             | Median (P25-P75)              | Median (P25-P75)               | Median (P25-P75)              |                 |
| BMI (kg/m <sup>2</sup> )                                    | 21.1 (19.5-24.4)              | 20.72(19.1-23.3)               | 21.18 (19.1-24.5)             | 0.89            |
| BF%                                                         | 28.3 (24.6-32.2)              | 29.0 (26.2-34.5)               | 31.2 (26.2-37.4)              | 0.25            |
| WHtR                                                        | 0.41 (0.39-0.44)              | 0.42 (0.40-0.46)               | 0.43 (0.40-0.48)              | 0.707           |
| Neck Circumference                                          | 30.0 (29.02-31.0)             | 30.7 (28.9-31.9)               | 30.5 (29.2-31.7)              | 0.34            |
| SBP (mmHg)                                                  | 105.0 (100.0-110.5)†          | 105.5 (99.0-112.5)             | 107.5 (100.0-115.0)†          | <b>0.009*</b>   |
| DBP (mmHg)                                                  | 70.0 (65.0-75.0)†             | 69.5 (65.0-73.5)               | 70.7 (65.0-76.1)†             | <b>0.018*</b>   |
| Total Cholesterol (mg/dL)                                   | 148 (141.0-162.5)             | 151.5 (130.2-164.0)            | 146.0 (131.0-165.0)           | 0.657           |
| HDL (mg/dL)                                                 | 51.0 (42.0-57.1)              | 54.0 (48.0-58.0)†              | 48.0 (42.0-57.0)†             | <b>0.004*</b>   |
| LDL (mg/dL)                                                 | 80.6 (66.5-99.9)              | 70.0 (68.5-93.4)               | 82.4 (69.0-96.6)              | 0.646           |
| VLDL (mg/dL)                                                | 18.0 (13.7-20.1)‡             | 12.6 (9.6-18.0)‡               | 13.0 (10.3-17.1)              | <b>0.025*</b>   |
| Triglycerides (mg/dL)                                       | 90.0 (68.5-100.5)‡            | 63.0 (48.2-90.2)‡              | 65.0 (51.7-86.0)              | <b>0.025*</b>   |
| Glucose (mg/dL)                                             | 85.0 (81.0-88.0)              | 85.5 (81.0-90.0)               | 85.0 (80.2-89.0)              | 0.777           |
| Insulin (mUI/mL)                                            | 6.6 (4.6-8.2)                 | 6.3 (5.0-8.3)                  | 6.8 (5.1-9.2)                 | 0.654           |
| HOMA-IR                                                     | 1.5 (1.0-1.8)                 | 1.4 (1.0-1.9)                  | 1.5 (1.1-2.0)                 | 0.8             |
| Uric Acid (mg/dL)                                           | 3.4 (3.1-4.0)                 | 3.5 (3.0-3.9)                  | 3.6 (3.0-4.3)                 | 0.46            |
| hs-PCR (mg/dL)                                              | 0.06 (0.03-0.15)              | 0.04 (0.02-0.17)               | 0.07 (0.02-0.17)              | 0.82            |
| IL-6 (pg/mL)                                                | 2.5 (1.3-4.26)                | 1.9 (1.3-3.4)                  | 2.01 (1.3-2.8)                | 0.281           |
| TNF- $\alpha$ (pg/mL)                                       | 1.4 (1.1-2.8)                 | 1.7 (1.1-2.5)†                 | 2.1 (1.3-2.8)†                | <b>0.04*</b>    |
| Leptin (pg/mL)                                              | 6144.0 (2882.8-9851.1)        | 4974.0 (2708.7- 6515.5)        | 4988.0 (2974.0-8291.7)        | 0.362           |
| IL-10 (pg/mL)                                               | 1.4 (1.0-2.2)                 | 1.4 (1.0-1.9)                  | 1.4 (1.0-2.2)                 | 0.724           |

\* *significant p-values* ( $p < 0.005$ ) of Kruskal Wallis test; † *significant p-values* of Mann-Whitney test less or equal than Bonferroni significance correction ( $\leq 0.0166$ ). ‡ *significant p-values* of Mann-Whitney test larger than Bonferroni correction ( $> 0.0166$ ).

BMI: Body Mass Index; BF%: Body Fat percentage; SBP: Systolic Blood Pressure; DBP: Diastolic Blood Pressure; HDL: High Density Lipoprotein; LDL: Low Density Lipoprotein; VLDL: Very Low Density lipoprotein; HOMA-IR: Homeostasis Model Assessment – Insulin Resistance; hs-CRP: high sensitivity C-reactive Protein; IL-6: Interleukin-6; TNF- $\alpha$ : Tumor Necrosis Factor- $\alpha$ ; IL-10: Interleukin-10.

**Supplementary material 2 – Association of inflammatory markers with lifestyle (LCA model) and cardiometabolic disease risk factors.**

| Variables                                                               | †TNF- $\alpha$         |              |                           |                | †IL-6                  |              |                           |                | †Leptin                |               |                               |                |
|-------------------------------------------------------------------------|------------------------|--------------|---------------------------|----------------|------------------------|--------------|---------------------------|----------------|------------------------|---------------|-------------------------------|----------------|
|                                                                         | $\beta$<br>Coefficient | CI 95%       | <i>p</i>                  | R <sup>2</sup> | $\beta$<br>Coefficient | CI 95%       | <i>p</i>                  | R <sup>2</sup> | $\beta$<br>Coefficient | CI 95%        | <i>p-value</i>                | R <sup>2</sup> |
| LCA Model<br>#Active & Sedentary LS +<br>Inactive & Non-Sedentary<br>LS | 1                      | -            | -                         | -              | -                      | -            | -                         | -              | -                      | -             | -                             | -              |
| Inactive & Sedentary LS                                                 | 0.455                  | 0.047-0.354  | <b>0.01</b> <sup>‡</sup>  | 0.021          | -0.113.                | 0.29-0.03    | <b>0.117</b> <sup>‡</sup> | 0.008          | 0.117                  | .086-0.320    | 0,257                         | 0.004          |
| BF%                                                                     | 0.007                  | 0.001-0.015  | <b>0.085</b> <sup>‡</sup> | 0.00           | 0.001                  | 0.006-0.010  | 0.588                     | 0.001          | 0.069                  | 0.062-0.076   | <b>&lt;0,001</b> <sup>‡</sup> | 0.5            |
| SBP (mmHg)                                                              | 0.003                  | 0.003-0.009  | 0.317                     | 0.003          | -0.008                 | 0.014-.0.003 | <b>0.004</b> <sup>‡</sup> | 0.022          | 0.023                  | 0.016-0.03    | <b>&lt;0,001</b> <sup>‡</sup> | 0.108          |
| DBP (mmHg)                                                              | 0.003                  | 0.005-0.010  | 0.646                     | 0.001          | -0.014                 | 0.021-.0.006 | <b>0.001</b> <sup>‡</sup> | 0.03           | 0.028                  | 0.018-0.037   | <b>&lt;0,001</b> <sup>‡</sup> | 0.085          |
| Total Cholesterol (mg/dL)                                               | 0.00000                | 0.002-0.003  | 0.864                     | 0.00           | 0.00                   | 0.002-0.003  | 0.814                     | <0.001         | 0.002                  | .0.001-0.005  | <b>0,144</b> <sup>‡</sup>     | 0.006          |
| HDL (mg/dL)                                                             | -0.006                 | 0.012- 0.001 | <b>0.039</b> <sup>‡</sup> | 0.011          | 0.001                  | 0.005-0.007  | 0.787                     | <0.001         | -0.01                  | .0.017-.0.137 | <b>0,007</b> <sup>‡</sup>     | 0.137          |
| LDL (mg/dL)                                                             | 0                      | 0.003-0.003  | 0.796                     | 0.00           | -0.001                 | 0.003-0.002  | 0.723                     | <0.001         | 0.004                  | 0.001-0.008   | <b>0,022</b> <sup>‡</sup>     | 0.013          |
| VLDL (mg/dL)                                                            | 0.014                  | 0.005-0.023  | <b>0.003</b> <sup>‡</sup> | 0.023          | 0.007                  | 0.002-0.017  | <b>0.109</b> <sup>‡</sup> | 0.007          | 0.013                  | 0.002-0.024   | <b>0,026</b> <sup>‡</sup>     | 0.013          |
| Triglycerides (mg/dL)                                                   | 0.003                  | 0.001-0.005  | <b>0.003</b> <sup>‡</sup> | 0.023          | 0.001                  | 0.000-0.003  | <b>0.109</b> <sup>‡</sup> | 0.007          | 0.003                  | 0.000-0.005   | <b>0,026</b> <sup>‡</sup>     | 0.013          |
| Glucose (mg/dL)                                                         | 0.007                  | 0.001-0.017  | <b>0.093</b> <sup>‡</sup> | 0.007          | -0.005                 | 0.014-0.004  | 0.306                     | 0.003          | 0.002                  | .0.007-.0.011 | 0,636                         | 0.001          |
| HOMA-IR                                                                 | 0.027                  | 0.043-0.096  | 0.452                     | 0.001          | 0.079                  | 0.010-0,148  | <b>0.026</b> <sup>‡</sup> | 0.013          | 0.319                  | 0.239-0.399   | <b>&lt;0,000</b> <sup>‡</sup> | 0.138          |
| Uric Acid(mg/dL)                                                        | 0.011                  | 0.079-0.057  | 0.746                     | 0.00           | 0.036                  | 0.032-0.104  | 0.299                     | 0.003          | 0.24                   | 0.157-0.324   | <b>&lt;0,001</b> <sup>‡</sup> | 0.77           |
| hs-CRP (mg/dL)                                                          | 0.414                  | 0.122-0.705  | <b>0.005</b> <sup>‡</sup> | 0.02           | 0.146                  | 0.147-0.439  | 0.327                     | 0.003          | 0.743                  | 0.386-1.101   | <b>&lt;0,001</b> <sup>‡</sup> | 0.042          |

#class 1 and class 2 collapsed; †Cardiometabolic Markers that showed normal distribution after logarithmic transformation. ‡ Variables with values of  $p < 0.200$  that will be considered for the multiple regression model.

LCA: Latent Class Analysis; LS: Lifestyle; BF%: Body Fat Percentage; SBP: Systolic Blood Pressure; DBP: Diastolic Blood Pressure; HDL: High Density Lipoprotein; LDL: Low Density Lipoprotein; VLDL: Very Low Density lipoprotein; HOMA-IR: Homeostasis Model Assessment – Insulin Resistance; hs-CRP: high sensitivity C-reactive Protein.
